# Supplementary material for: Potential of the Endophytic Fungus Phialocephala fortinii Rac56 Found in Rhodiola Plants to Produce Salidroside and p-Tyrosol
Source: MDPI journal article supplement (doi:10.3390/molecules21040502), 2016-04-16
Supplement: s1 [file s1]

# Supplementary Materials: Potential of the Endophytic Fungus *Phialocephala fortinii* Rac56 Found in *Rhodiola* Plants to Produce Salidroside and *p*-Tyrosol

Jinlong Cui, Tingting Guo, Jianbin Chao, Mengliang Wang and Junhong Wang

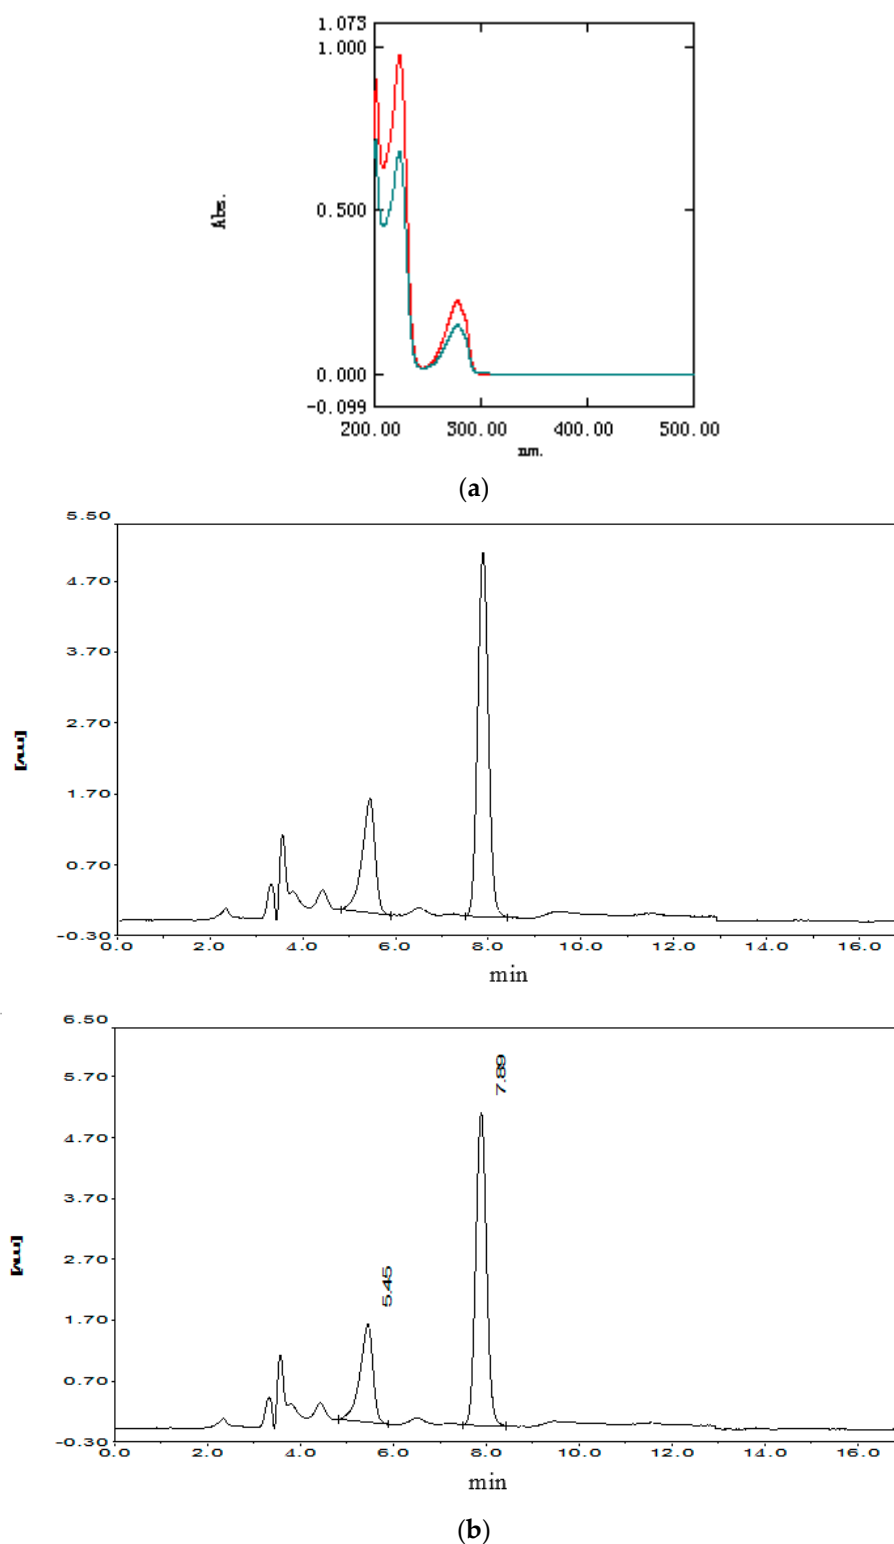

Figure S1. Cont.

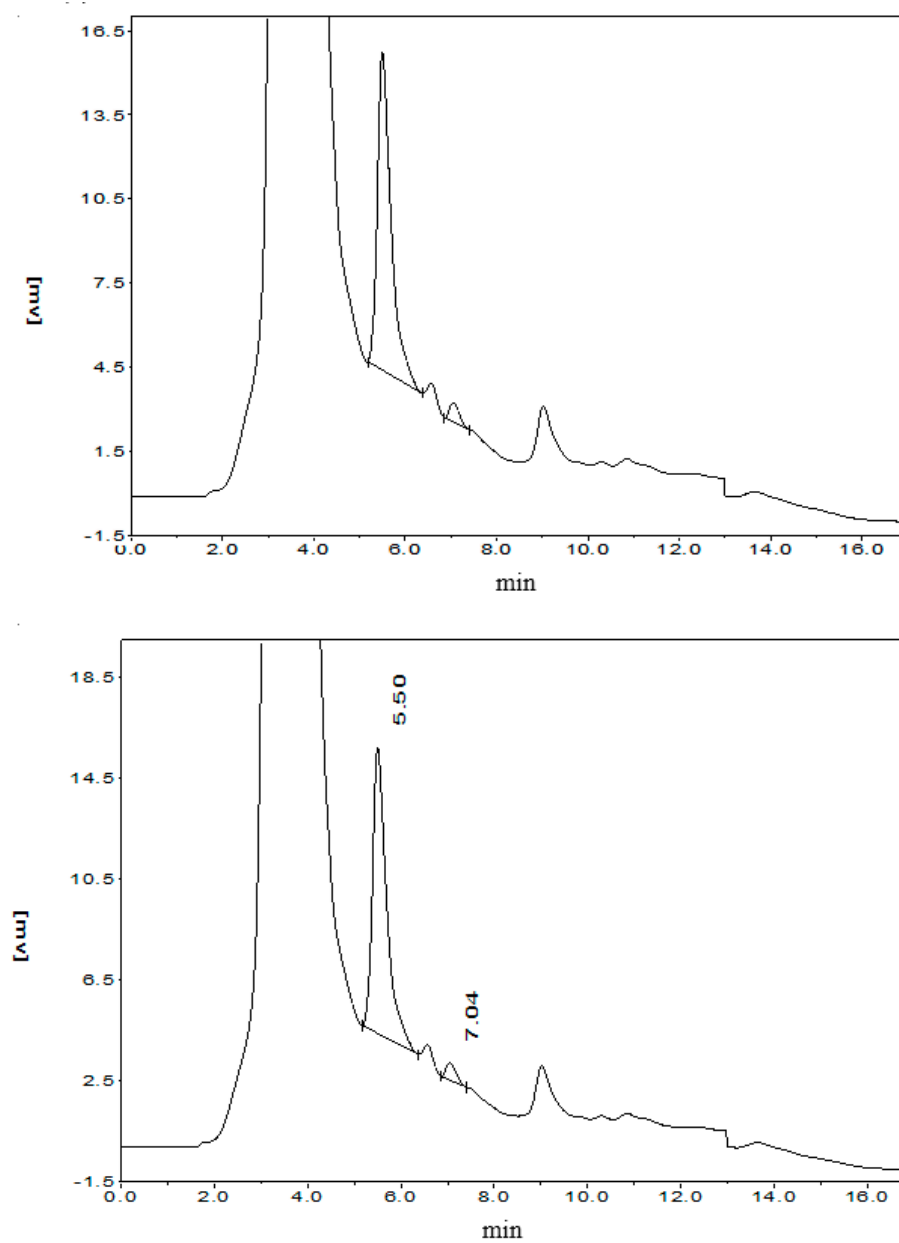

(c)

Figure S1. Cont.

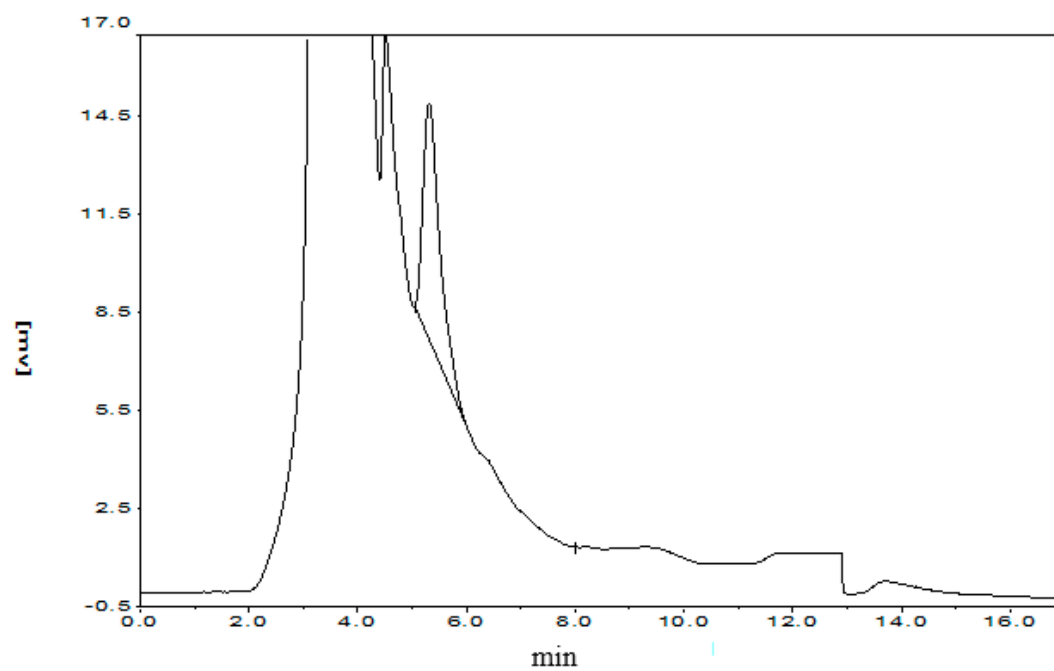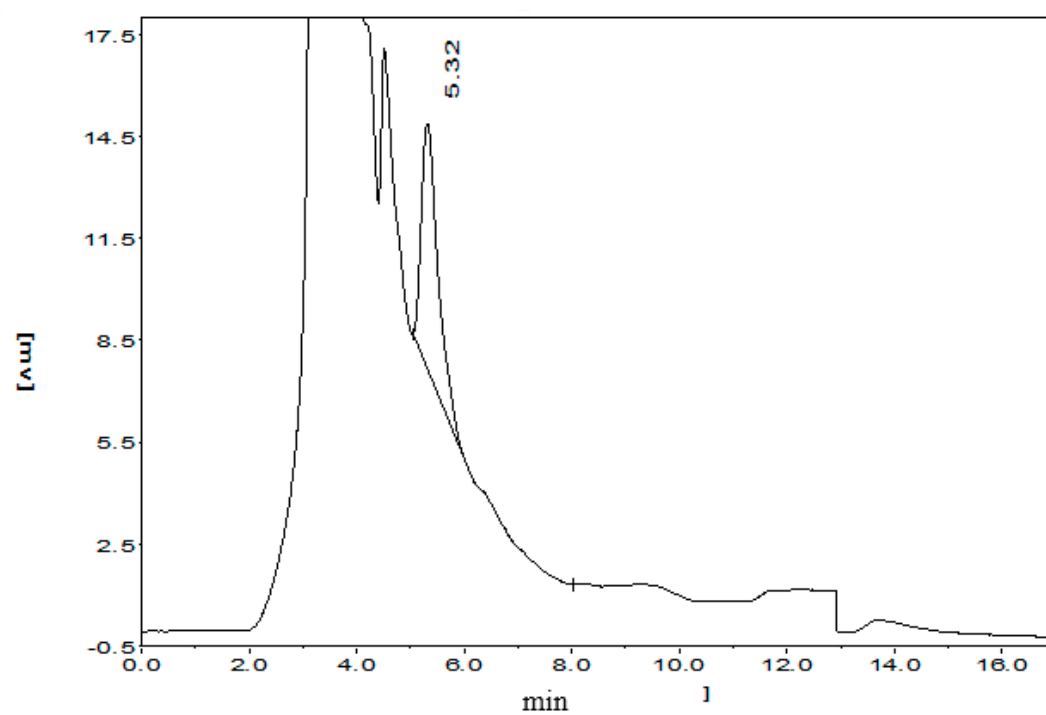

(d)

Figure S1. Cont.

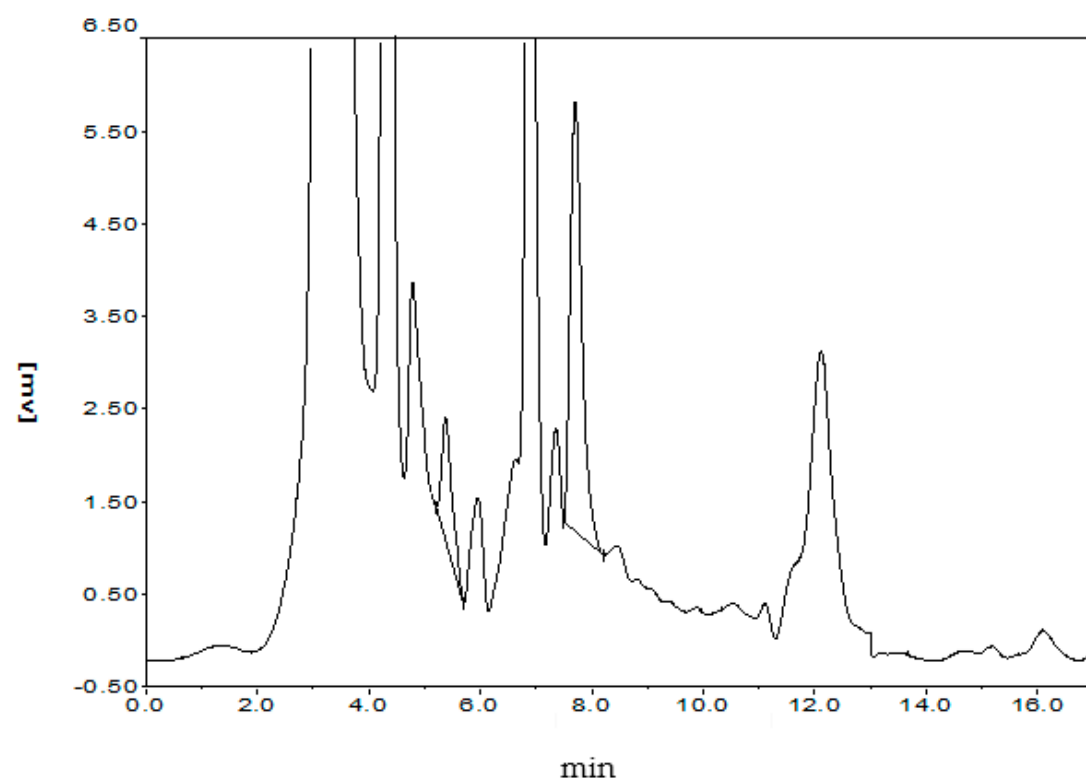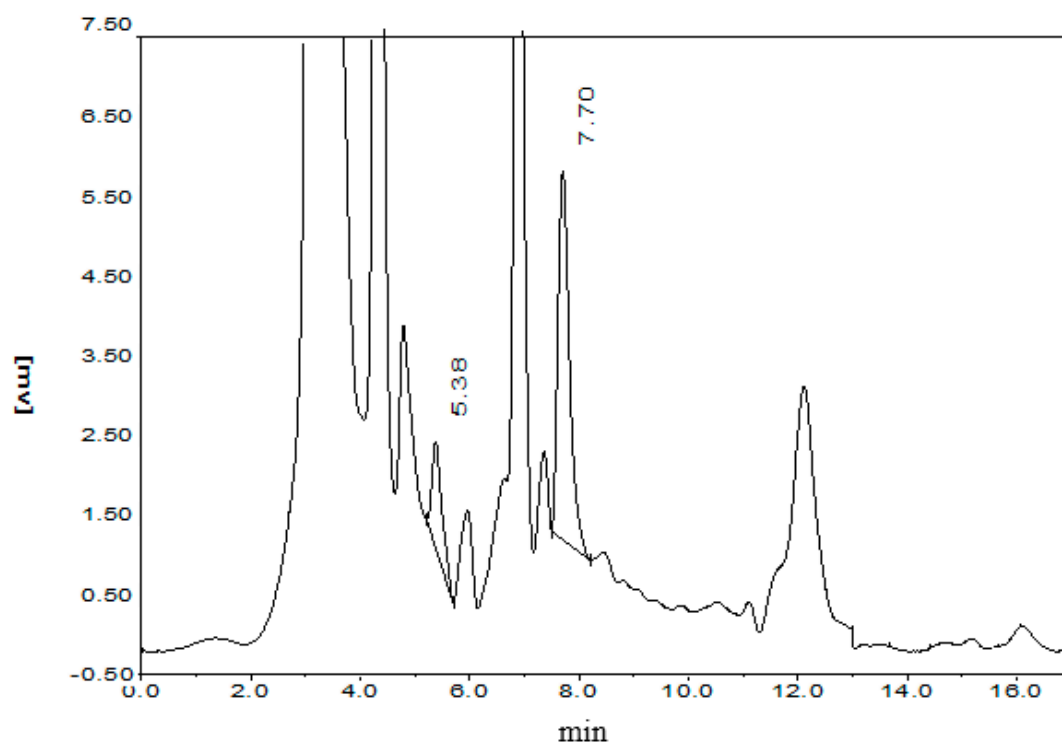

(e)

Figure S1. Cont.

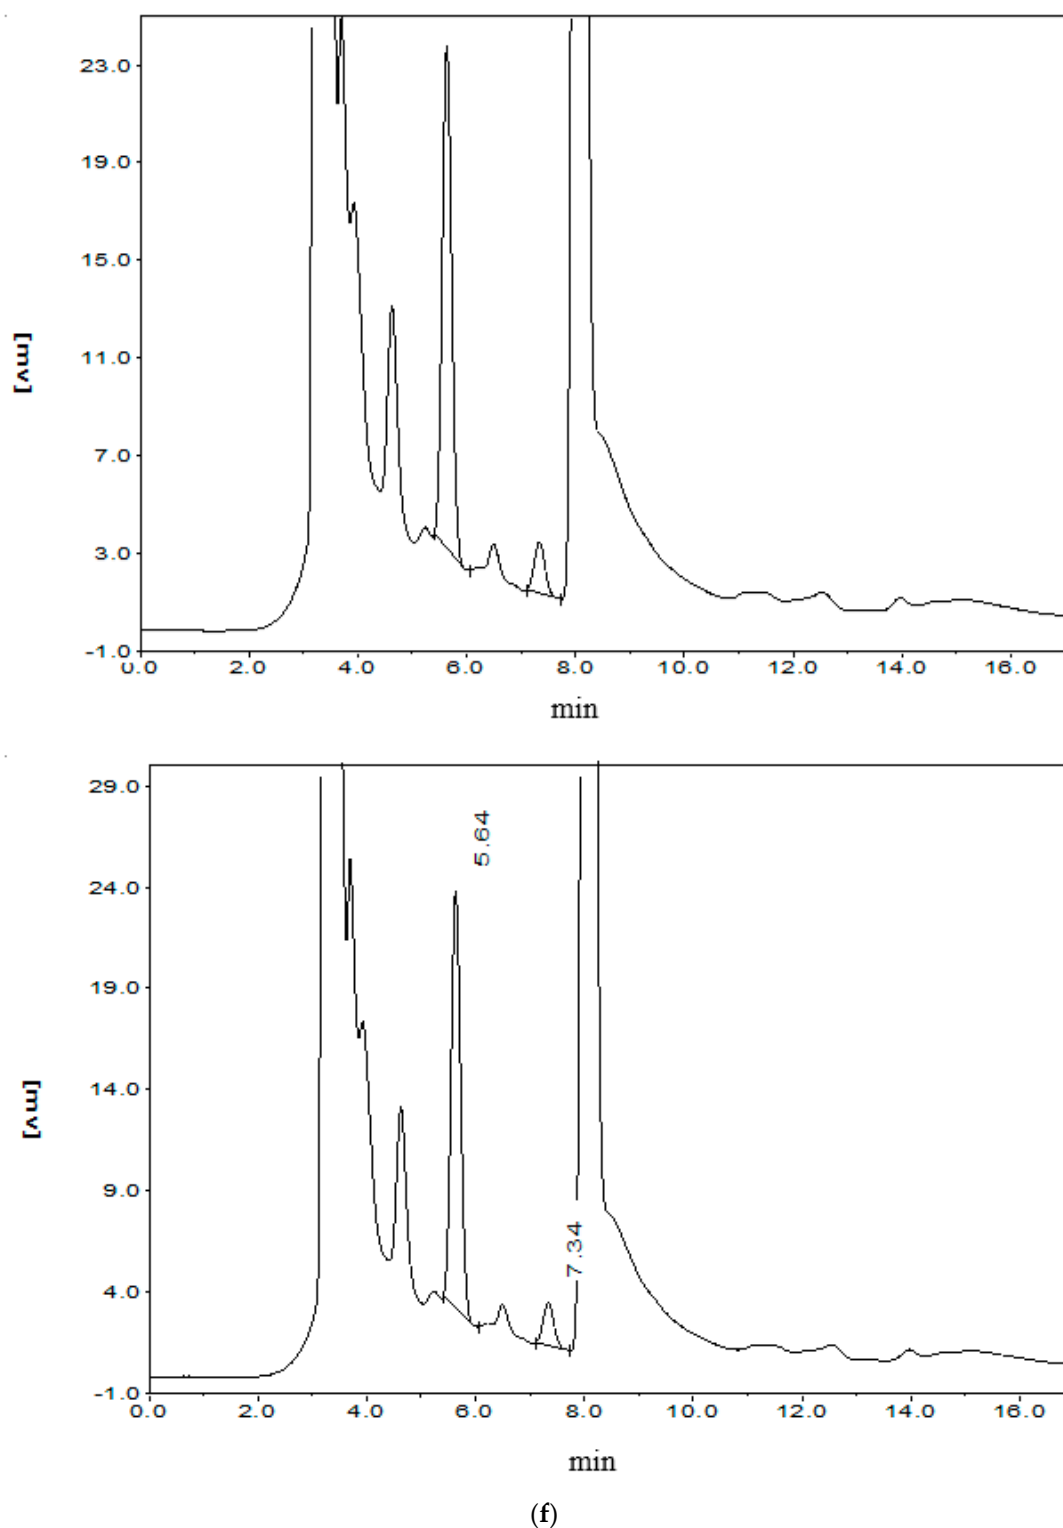

**Figure A1.** Ultraviolet absorption and high performance liquid chromatogram of substances. (a) Ultraviolet absorption. (b) Authentic salidroside (SAL) and p-tyrosol (TYR) and fungal SAL and TYR. (c–f) were the records of Rac12 (mycelial extract), Rct30 (mycelial extract), Rac56 (filtrate extract) and Rac63 (filtrate extract), respectively. The mobile phase consisted of methanol (Solvent A):water (Solvent B) = 30:70 at a flow rate of 1.0 mL/min at 30 °C was monitored using a UV-detector at 276 nm. Four fungal samples showed peaks of SAL and TYR with identical retention times as the authentic SAL and TYR.
